# Supplementary material for: Bidirectional S-bridge coordination in the magnetic Au/FeOxSy catalyst for the catalytic oxidation of 5-hydroxymethylfurfural to 2,5-furandicarboxylic acid
Source: Royal Society of Chemistry journal article supplement (doi:10.1039/d4ta09277e), 2025-01-01
Supplement: d4ta09277e1.pdf [file d4ta09277e1.pdf]

## Supplementary Information

# **Bidirectional S-Bridge Coordination in Magnetic Au/FeO<sub>x</sub>S<sub>y</sub> Catalyst for the Catalytic Oxidation of 5- Hydroxymethylfurfural to 2,5-Furandicarboxylic Acid**

Yu Ruan,<sup>a</sup> Shaoyi Wu,<sup>a</sup> Yingxin Lu,<sup>a</sup> Tiefeng Xu,<sup>\*ab</sup> Wenxing Chen<sup>ab</sup> and Wangyang Lu<sup>ab</sup>

<sup>a</sup>State Key Laboratory of Bio-based Fiber Materials, Zhejiang Sci-Tech University,  
Hangzhou 310018, China

<sup>b</sup>Zhejiang Provincial Innovation Center of Advanced Textile Technology, Shaoxing  
312000, China

### **Corresponding Author:**

\* E-mail: xutiefeng@zstu.edu.cn (T. Xu)

Tel: +86 571 86843611; Fax: +86 57186843611.

## 1. Materials

In this study, a range of chemicals and reagents were used for the experiments. These included chloroauric acid ( $\text{HAuCl}_4 \cdot 4\text{H}_2\text{O}$ , 99.95 %, Au > 47.8 %), sodium hydroxide (NaOH, AR), ferric chloride ( $\text{FeCl}_3$ ), thiourea ( $\text{CH}_4\text{N}_2\text{S}$ ), anhydrous sodium acetate ( $\text{C}_2\text{H}_3\text{NaO}_2$ ), 5-hydroxymethyl-2-furaldehyde (HMF, 95 %), 5-formyl-2-furancarboxylic acid (HMFCA, 98 %), 5-Hydroxymethyl-2-furancarboxylic acid (FFCA, 98 %), 2,5-furandicarboxylic acid (FDCA, 98 %), sodium carbonate anhydrous, Triethylamine ( $\text{Et}_3\text{N}$ ), isopropyl alcohol (IPA), p-benzoquinone(p-BQ), and L-histidine (L-His), all of which were sourced from Aladdin Chemical Co., Ltd. 5,5-dimethyl-1-pyrroline-N-oxide (DMPO), 2,2,6,6-tetramethyl-4-piperidinol (TEMP), and 2,2,6,6-tetramethyl-1-piperidinyloxy (TEMPO) were obtained from J&K Chemical Ltd. Ethylene glycol was obtained from McLean.

## 2. Characterization

Transmission electron microscopy (TEM) and high-resolution transmission electron microscopy (HRTEM) of the sample were conducted on a Bruker Nano GmbH Berlin microscopy at an acceleration voltage of 200 kV. A Bruker Nano GmbH Berlin microscopy equipped with an energy dispersive X-ray (EDS) detector was applied. The X-ray photoelectron spectroscopy (XPS, K-Alpha, Thermo, USA) with monochromatic Al  $\text{K}\alpha$  radiation (1486.6 eV) as the X-ray source was utilized. The powder X-ray diffraction (XRD, Empyrean) patterns of all samples were investigated using Empyrean

in the  $2\theta$  range of 10-90° with Cu K $\alpha$  radiation. Electron paramagnetic resonance (EPR) was performed on a Bruker A300 spectrometer. The Raman spectrometer used was a Renishaw inVia Raman Microscope.

### 3. Liquid phase methods

Ultra Performance Liquid Chromatography (UPLC, Waters) method: The column temperature was set at 40 °C and the mobile phase was a mixture of methanol (solvent A) and water containing 0.1 % H<sub>2</sub>SO<sub>4</sub> (solvent B). The intermediates were detected during the separation using an eluent gradient scheme: from 0 to 0.5 min, 5 % A; from 0.5 to 2.0 min, 5 % - 8 % A (linear); from 2.0 to 3.0 min, 8 % - 10 % A (linear); from 3.0 to 4.0 min, 10 % - 15 % A (linear); from 4.0 to 4.5 min, 15 % - 5 % A (linear); from 4.5 to 5.0 min, 5 % A (linear). The flow rate was 0.3 mL/min and the detection wavelengths of HMF, HMFCA, and FDCA were 285, 253, and 266 nm, respectively.

### 4. DFT calculations

All the DFT calculations were conducted based on the Vienna Ab-initio Simulation Package (VASP) <sup>[1-2]</sup>. The exchange-correlation effects were described by the Perdew-Burke-Ernzerhof (PBE) functional within the generalized gradient approximation (GGA) method <sup>[3-4]</sup>. The core-valence interactions were accounted for by the projected augmented wave (PAW) method <sup>[5]</sup>. The energy cutoff for plane wave expansions was set to 400 eV. The structural optimization was completed for energy and force convergence set at  $1.0 \times 10^{-4}$  eV and 0.05 eV Å<sup>-1</sup>, respectively. The Brillouin zone was

sampled with the  $2 \times 2 \times 1$  K-point. Grimme's DFT-D3 methodology<sup>[6]</sup> was used to describe the dispersion interactions.

The adsorption energies ( $E_{\text{ads}}$ ) of HMF are calculated by

$$E_{\text{ads}} = E_{*_{\text{HMF}}} - E_{\text{HMF}} - E_{\text{Sub}}$$

where  $E_{\text{HMF}}$  and  $E_{*_{\text{HMF}}}$  represent the energies before and after the adsorption of HMF on the substrates, respectively.  $E_{\text{sub}}$  is the energy of  $\text{Fe}_3\text{O}_4\text{-Au}$  and  $\text{Fe}_3\text{O}_4\text{-AuS}$  surfaces.

The Gibbs free energy change ( $\Delta G$ ) of each step is calculated using the following formula:

$$\Delta G = \Delta E + \Delta \text{ZPE} - T\Delta S$$

where  $\Delta E$  is the electronic energy difference directly obtained from DFT calculations,  $\Delta \text{ZPE}$  is the zero point energy difference,  $T$  is the room temperature (298.15 K) and  $\Delta S$  is the entropy change. ZPE could be obtained after frequency calculation by <sup>[7]</sup>:

$$\text{ZPE} = \frac{1}{2} \sum h\nu_i$$

And the TS values of adsorbed species are calculated according to the vibrational frequencies<sup>[8]</sup>:

$$TS = k_B T \left[ \sum_k \ln \left( \frac{1}{1 - e^{-h\nu/k_B T}} \right) + \sum_k \frac{h\nu}{k_B T} \frac{1}{(e^{h\nu/k_B T} - 1)} + 1 \right]$$

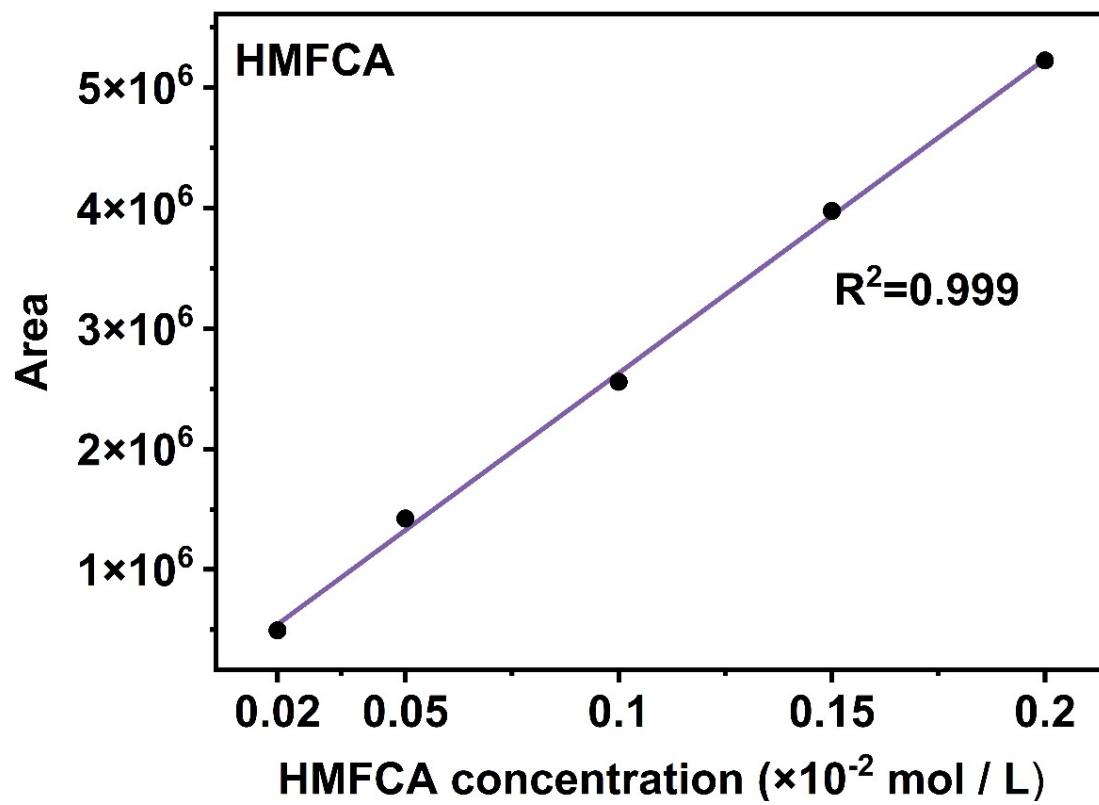

Fig. S1. Standardized graph of HMFCA.

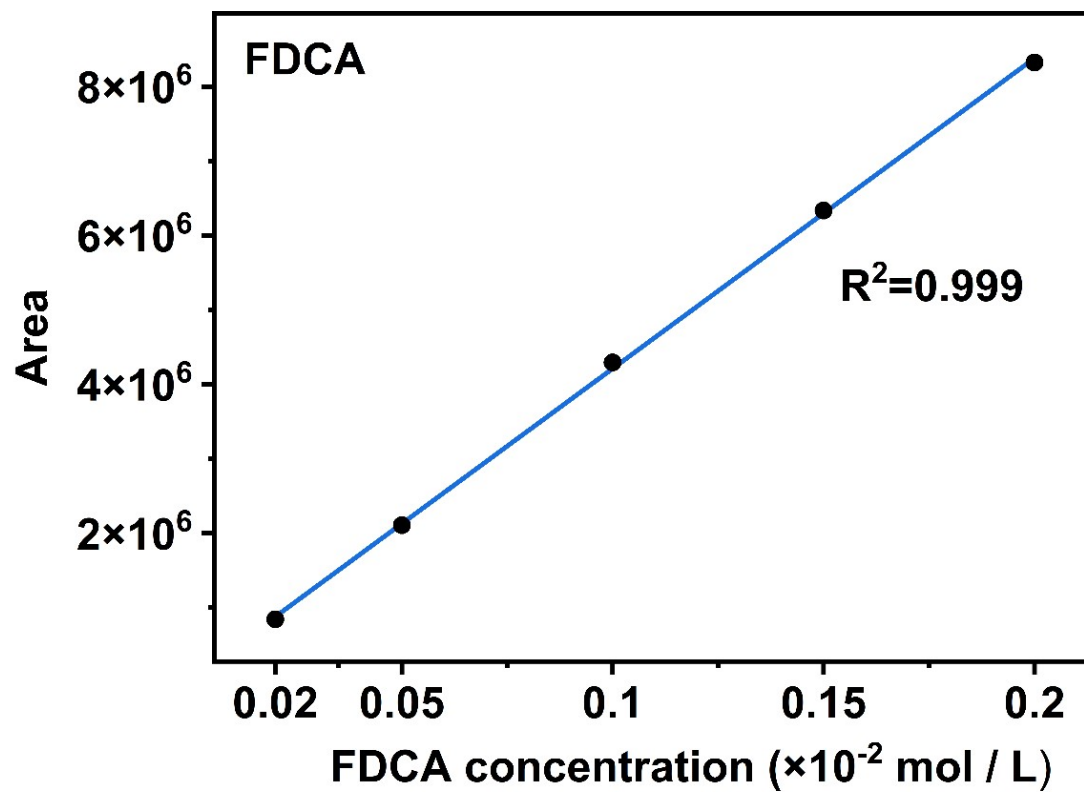

Fig. S2. Standardized graph of FDCA.

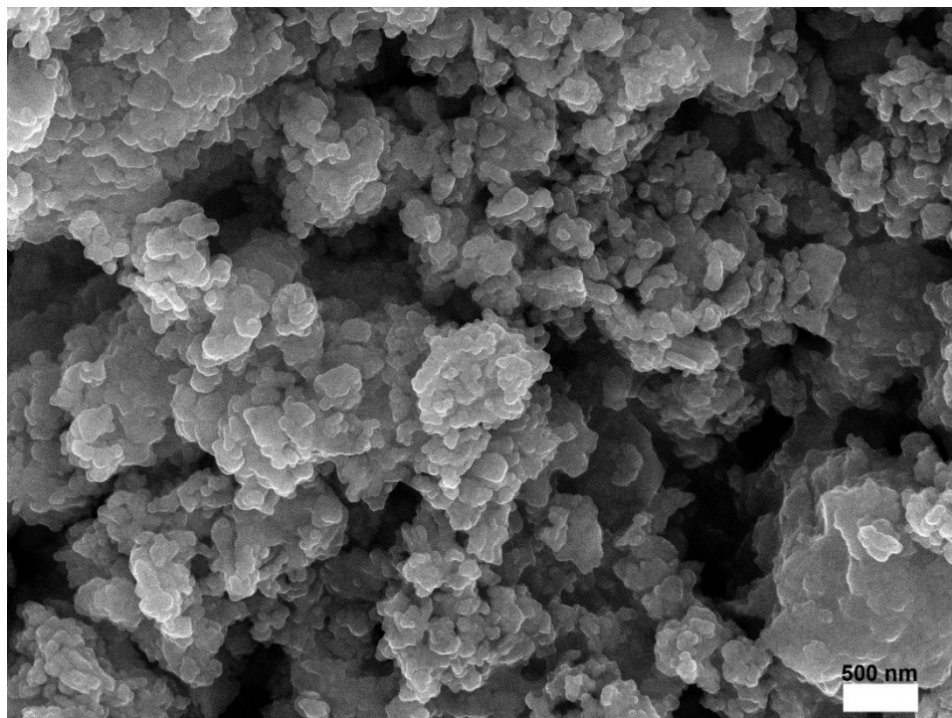

**Fig. S3.** SEM image of  $\text{FeO}_x\text{S}_y$ .

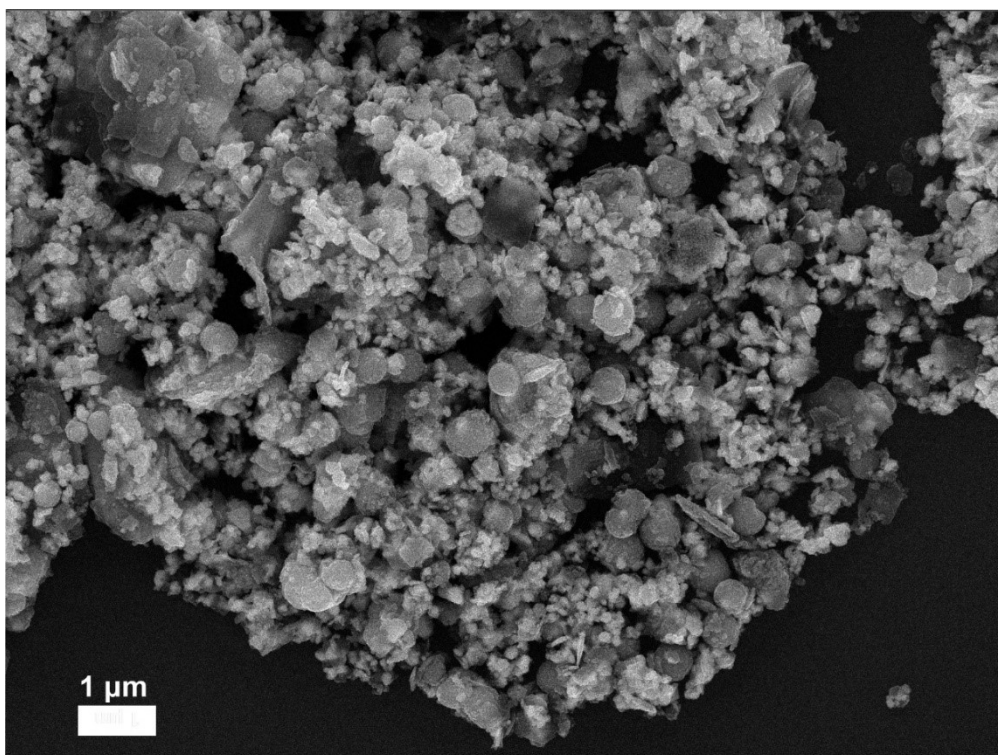

**Fig. S4.** SEM image of Au/FeO<sub>x</sub>S<sub>y</sub>-uncalcined.



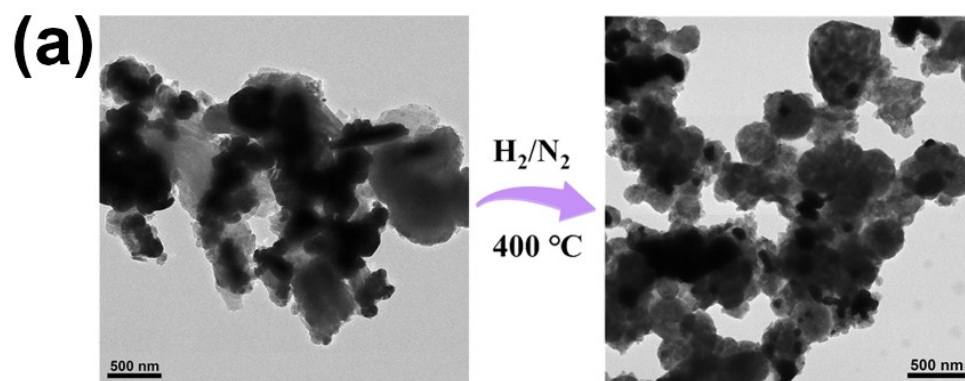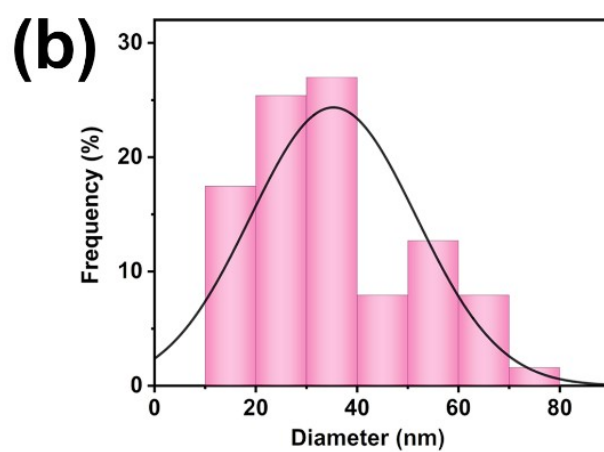

**Fig. S5.** (a) STEM comparison images before and after calcination. (b) Statistical analysis of Au particle size distribution of  $\text{Au}/\text{FeO}_x\text{S}_y$ .

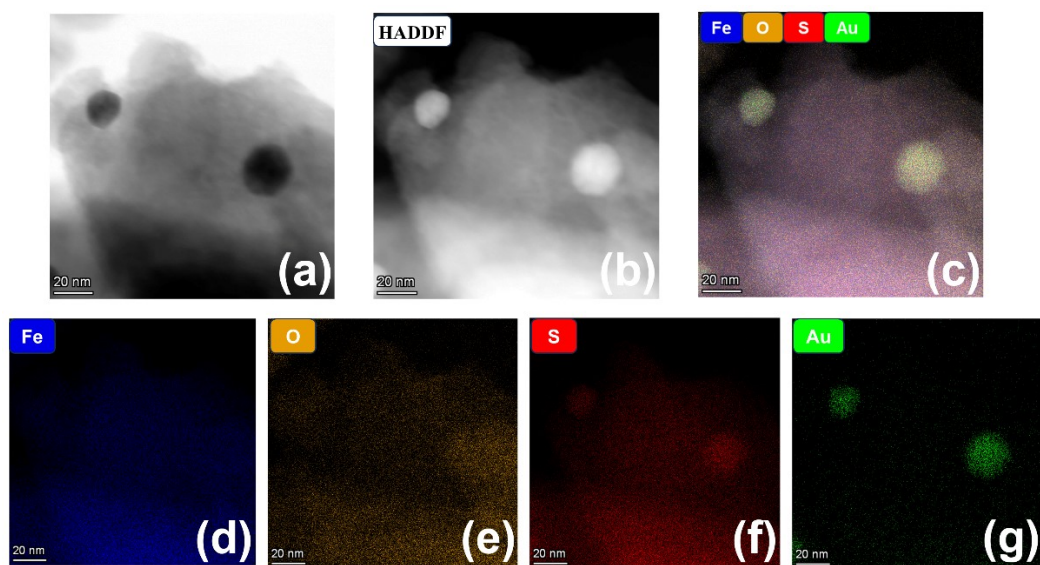

**Fig. S6.** (a) STEM image (b) HAADF-STEM image (c-g) Corresponding element mapping images of Au/FeO<sub>x</sub>S<sub>y</sub>-uncalined.

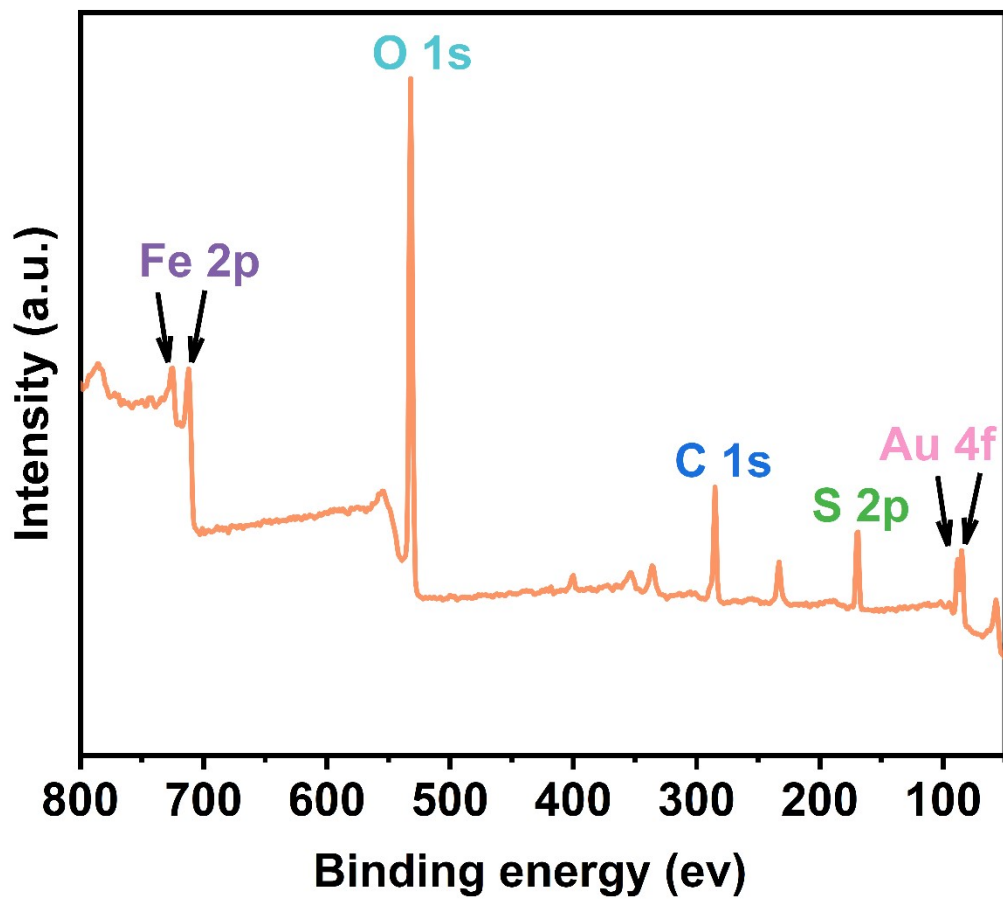

Fig. S7. XPS full-spectrum image.

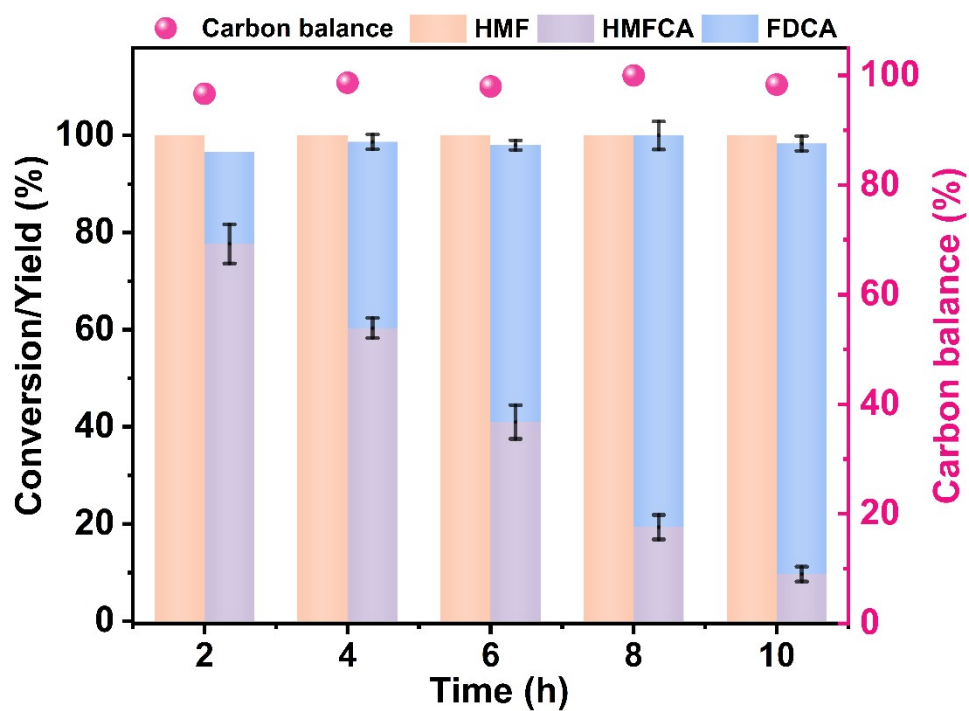

**Fig. S8.** Catalytic oxidation of HMF in the presence of Au/FeO<sub>x</sub>S<sub>y</sub> at 40°C. (Reaction conditions: 0.1 mmol HMF, 5 mL H<sub>2</sub>O,  $n(\text{Au})/n(\text{Fe}) = 0.5$ , 50 mg Catalyst,  $n(\text{NaOH})/$   
 $n(\text{HMF})$  = 5).

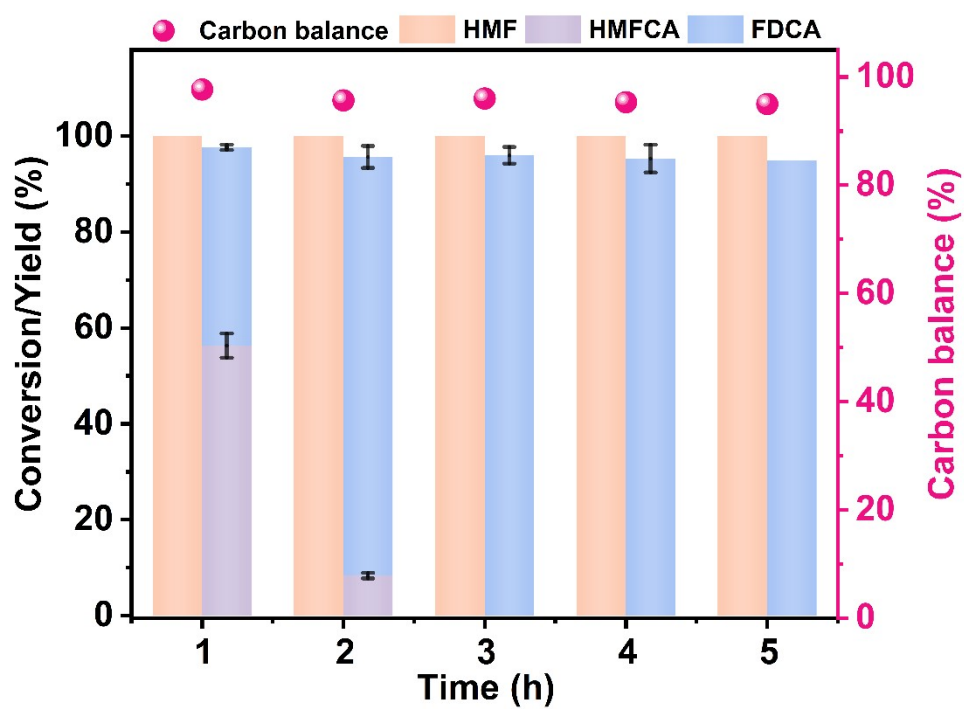

**Fig. S9.** Catalytic oxidation of HMF in the presence of Au/FeO<sub>x</sub>S<sub>y</sub> at 80°C. (Reaction conditions: 0.1 mmol HMF, 5 mL H<sub>2</sub>O,  $n(\text{Au})/n(\text{Fe}) = 0.5$ , 50 mg Catalyst,  $n(\text{NaOH})/$   
 $n(\text{HMF}) =$  5).

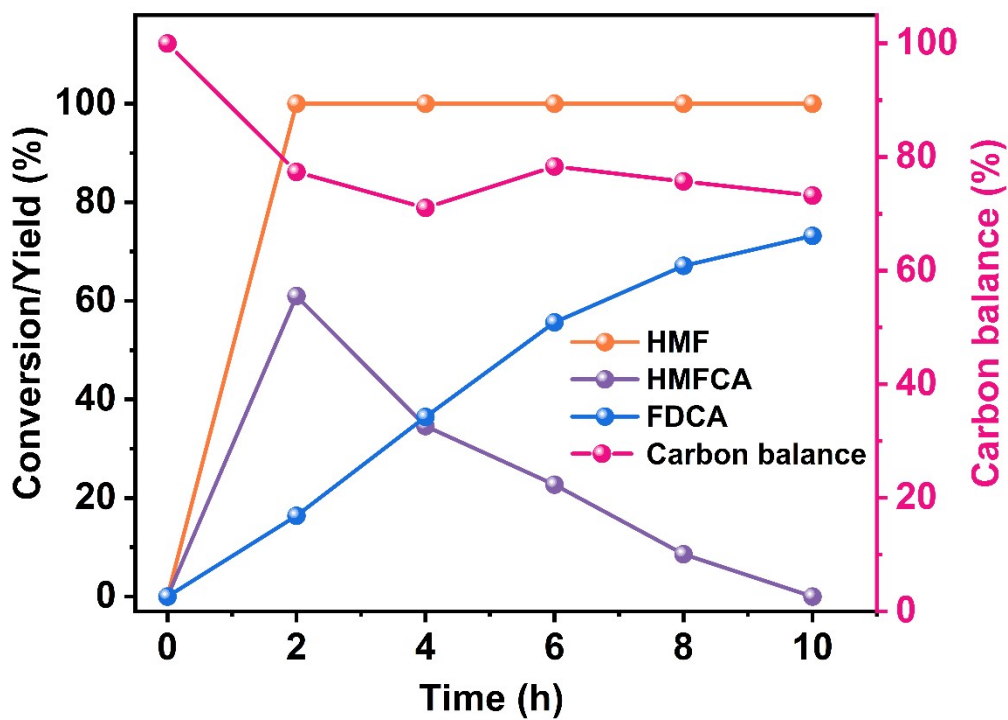

**Fig. S10.** Catalytic oxidation of HMF in the presence of Au/FeO<sub>x</sub>S<sub>y</sub> at 80°C. (Reaction conditions: 0.2 mmol HMF, 5 mL H<sub>2</sub>O,  $n(\text{Au})/n(\text{Fe}) = 0.5$ , 50 mg Catalyst,  $n(\text{NaOH})/$   
 $n(\text{HMF})$  = 5).

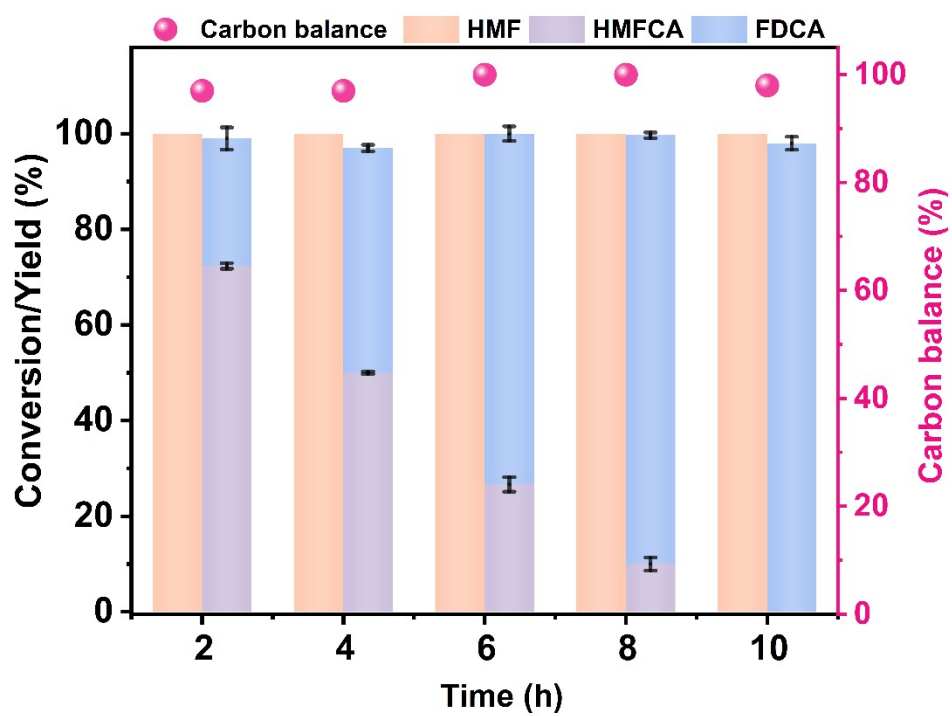

**Fig. S11.** Catalytic oxidation of HMF in the presence of the 30 mg Au/FeO<sub>x</sub>S<sub>y</sub>.  
 (Reaction conditions: 0.1 mmol HMF, 5 mL H<sub>2</sub>O,  $n(\text{Au})/n(\text{Fe}) = 0.5$ ,  
 $n(\text{NaOH})/n(\text{HMF}) = 5:1$ , 60 °C).

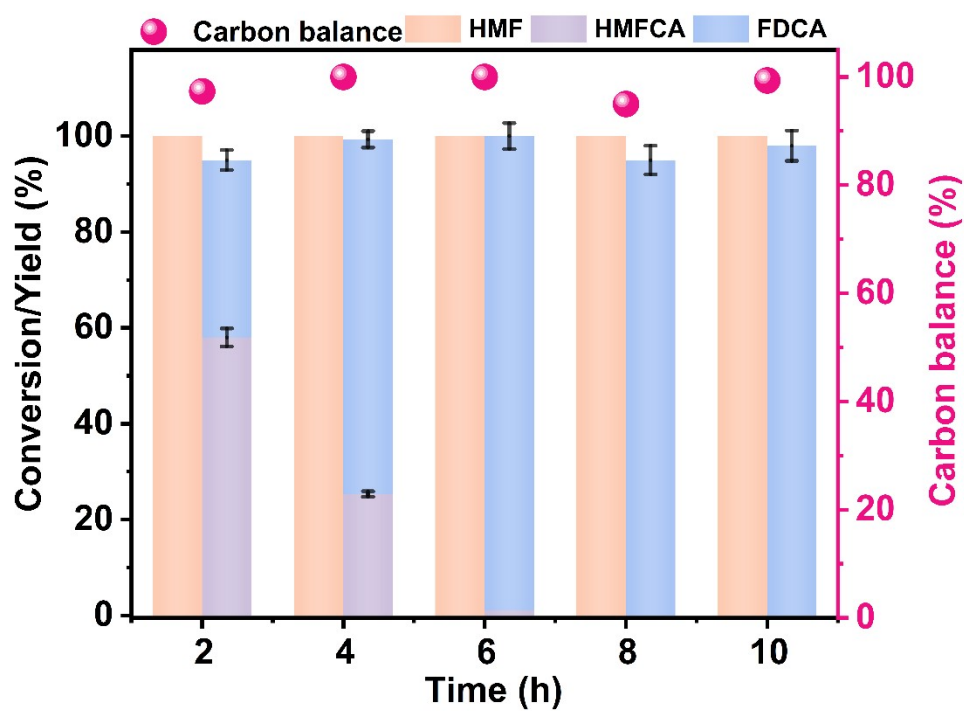

**Fig. S12.** Catalytic oxidation of HMF in the presence of the 40 mg Au/FeO<sub>x</sub>S<sub>y</sub>.  
 (Reaction conditions: 0.1 mmol HMF, 5 mL H<sub>2</sub>O,  $n(\text{Au})/n(\text{Fe}) = 0.5$ ,  
 $n(\text{NaOH})/n(\text{HMF}) = 5:1$ , 60 °C).



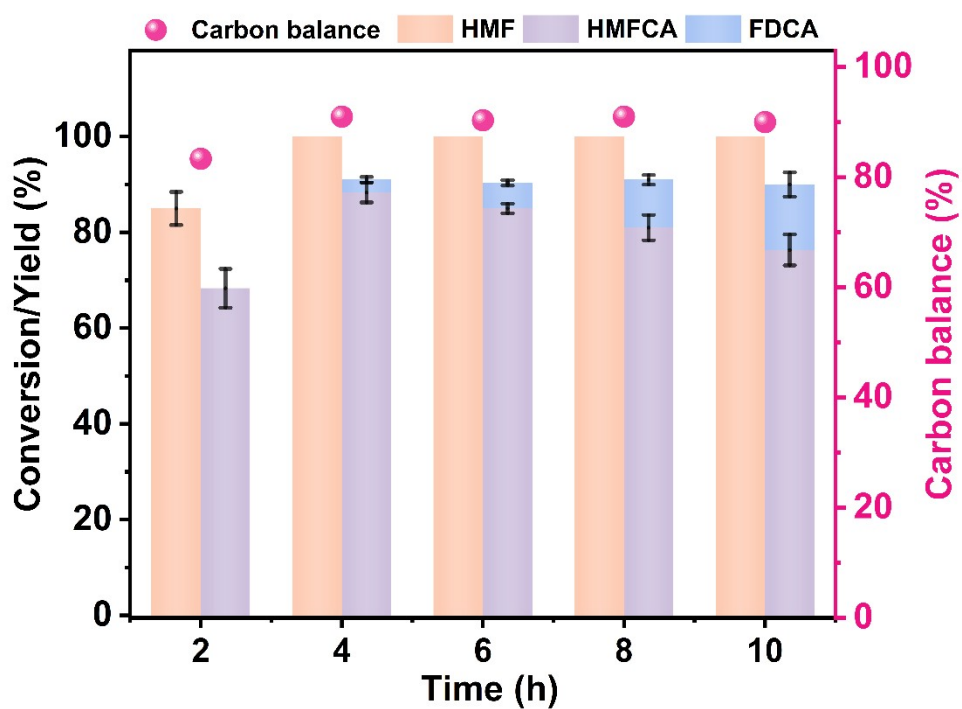

**Fig. S13.** Catalytic oxidation of HMF in the presence of Au/FeO<sub>x</sub>S<sub>y</sub> under N<sub>2</sub>. (Reaction conditions: 0.1 mmol HMF, 5 mL H<sub>2</sub>O,  $n(\text{Au})/n(\text{Fe}) = 0.5$ ,  $n(\text{NaOH})/n(\text{HMF}) = 5:1$ , 60 °C).

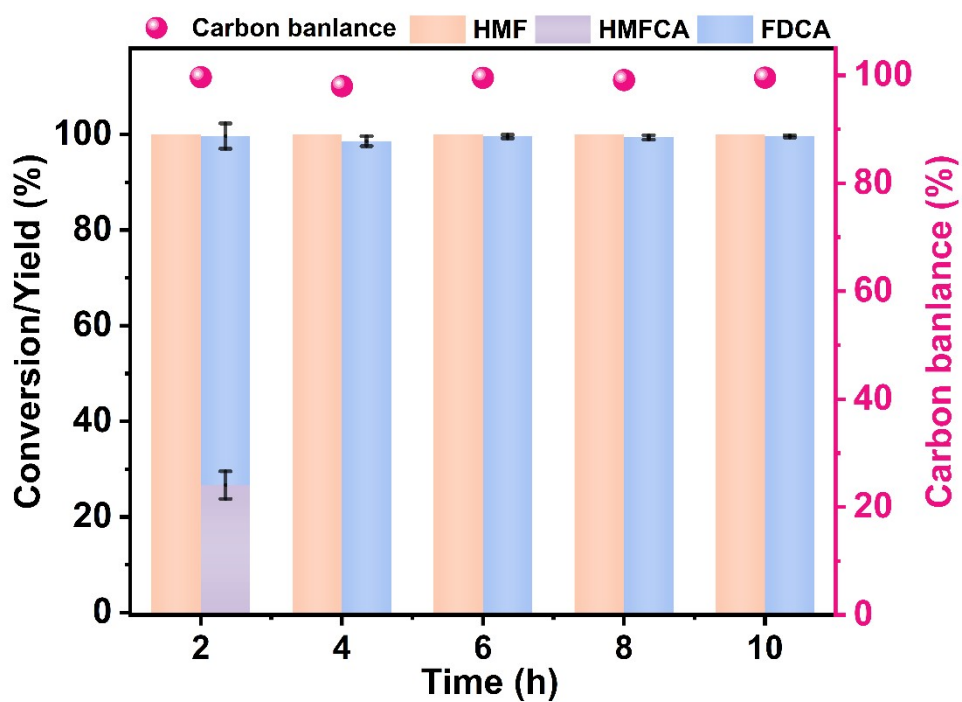

**Fig. S14.** Catalytic oxidation of HMF in the presence of Au/FeO<sub>x</sub>S<sub>y</sub> under O<sub>2</sub>. (Reaction conditions: 0.1 mmol HMF, 5 mL H<sub>2</sub>O,  $n(\text{Au})/n(\text{Fe}) = 0.5$ ,  $n(\text{NaOH})/n(\text{HMF}) = 5:1$ , 60 °C).

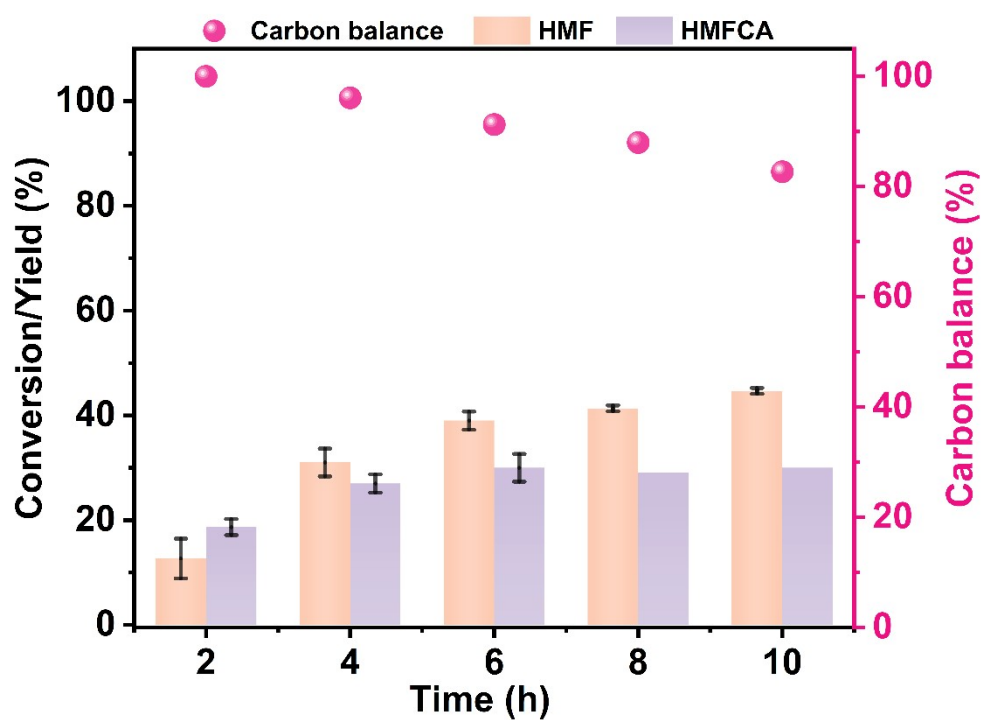

**Fig. S15.** Catalytic oxidation of HMF in the presence of Au/FeO<sub>x</sub>S<sub>y</sub>. (Reaction conditions: 0.1 mmol HMF, 5 mL H<sub>2</sub>O,  $n(\text{Au})/n(\text{Fe}) = 0.5$ , base-free, 60 °C).

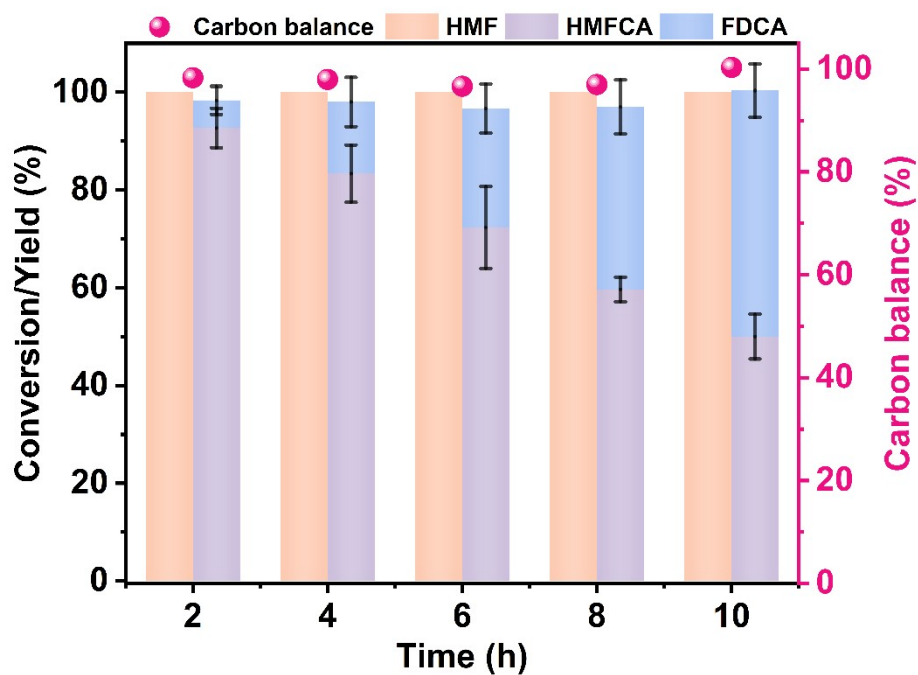

**Fig. S16.** Catalytic oxidation of HMF in the presence of Au/FeO<sub>x</sub>S<sub>y</sub>. (Reaction conditions: 0.1 mmol HMF, 5 mL H<sub>2</sub>O,  $n(\text{Au})/n(\text{Fe}) = 0.5$ ,  $n(\text{NaHCO}_3)/n(\text{HMF}) = 5:1$ , 60 °C).

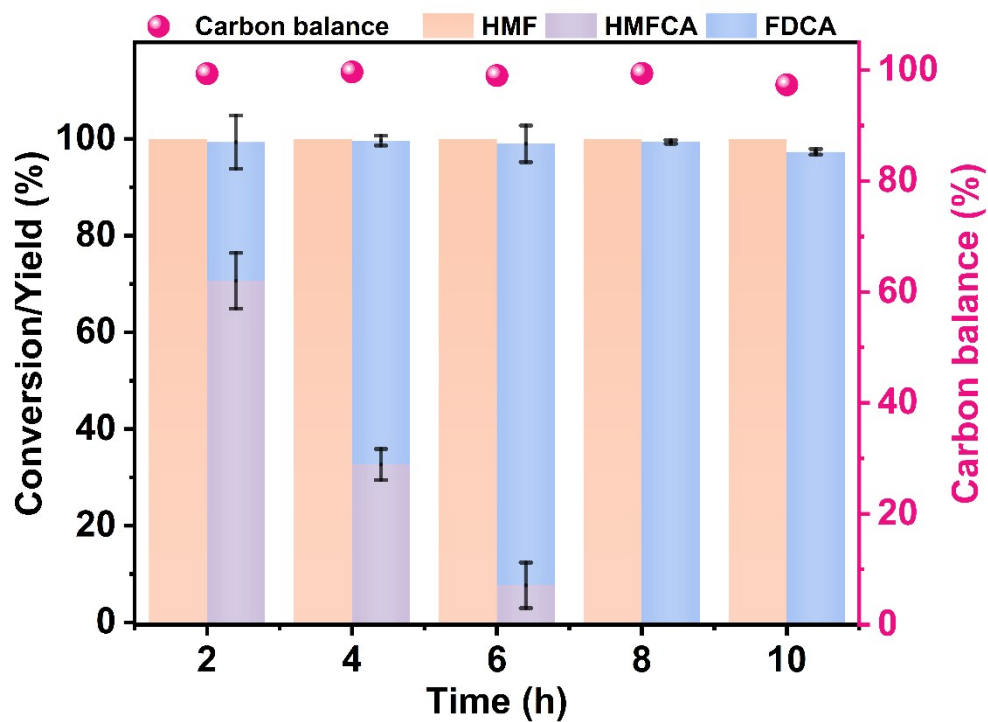

**Fig. S17.** Catalytic oxidation of HMF in the presence of Au/FeO<sub>x</sub>S<sub>y</sub>. (Reaction conditions: 0.1 mmol HMF, 5 mL H<sub>2</sub>O,  $n(\text{Au})/n(\text{Fe}) = 0.5$ ,  $n(\text{Na}_2\text{CO}_3)/n(\text{HMF}) = 5:1$ , 60 °C).

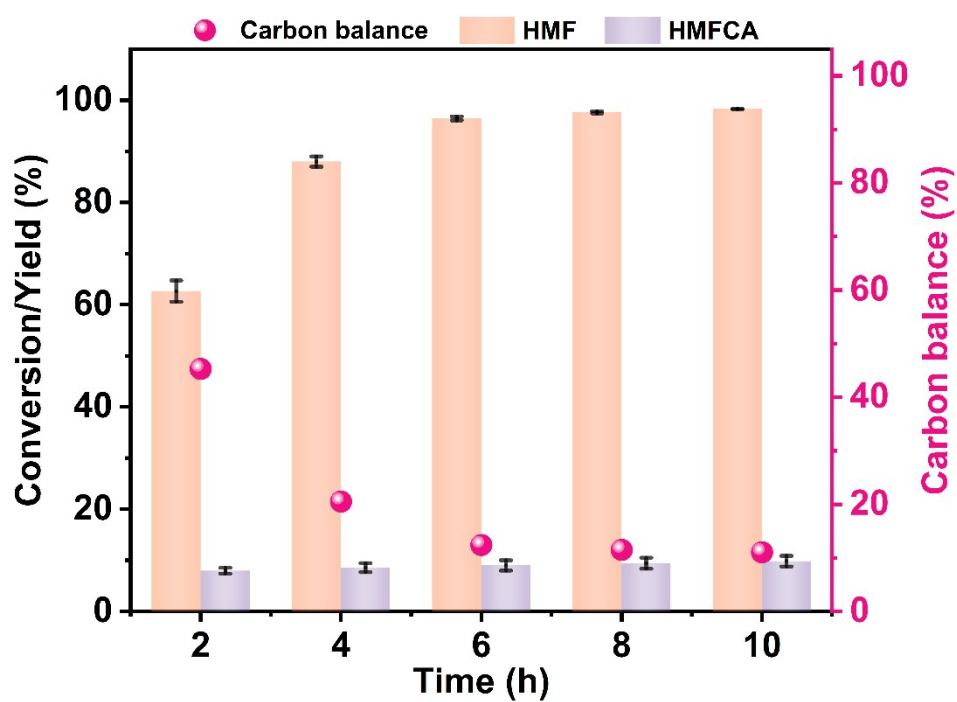

**Fig. S18.** Catalytic oxidation of HMF in the presence of Au/FeO<sub>x</sub>S<sub>y</sub>. (Reaction conditions: 0.1 mmol HMF, 5 mL H<sub>2</sub>O,  $n(\text{Au})/n(\text{Fe}) = 0.5$ ,  $n(\text{Et}_3\text{N})/n(\text{HMF}) = 5:1$ , 60 °C).

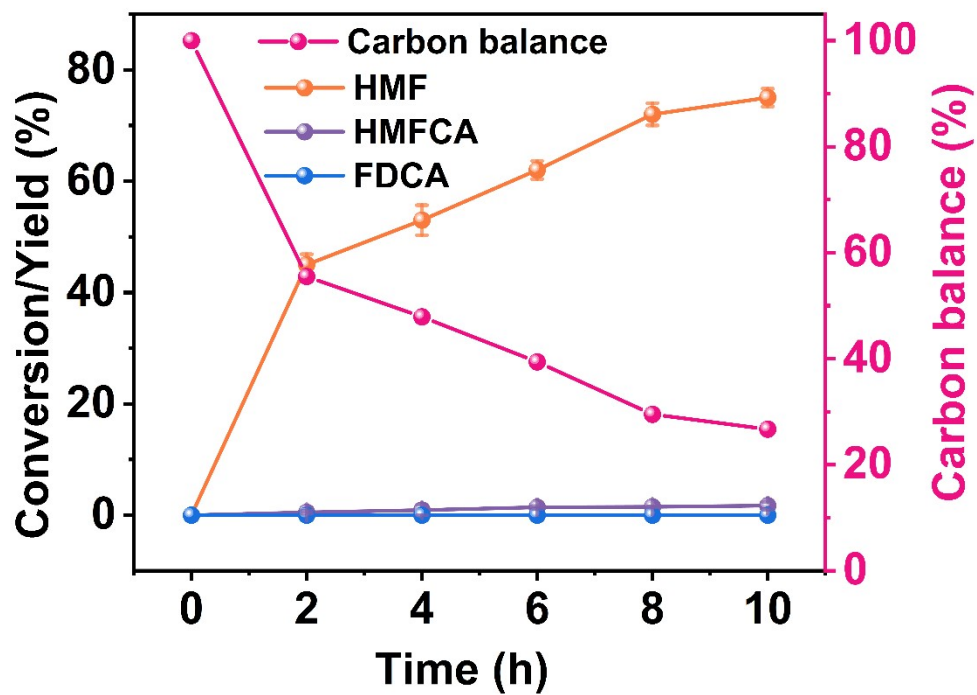

**Fig. S19.** Catalytic oxidation of HMF in the presence of  $\text{FeO}_x\text{S}_y$ . (Reaction conditions: 0.1 mmol HMF, 5 mL  $\text{H}_2\text{O}$ ,  $n(\text{Au})/n(\text{Fe}) = 0$ ,  $n(\text{NaOH})/n(\text{HMF}) = 5:1$ , 60 °C).

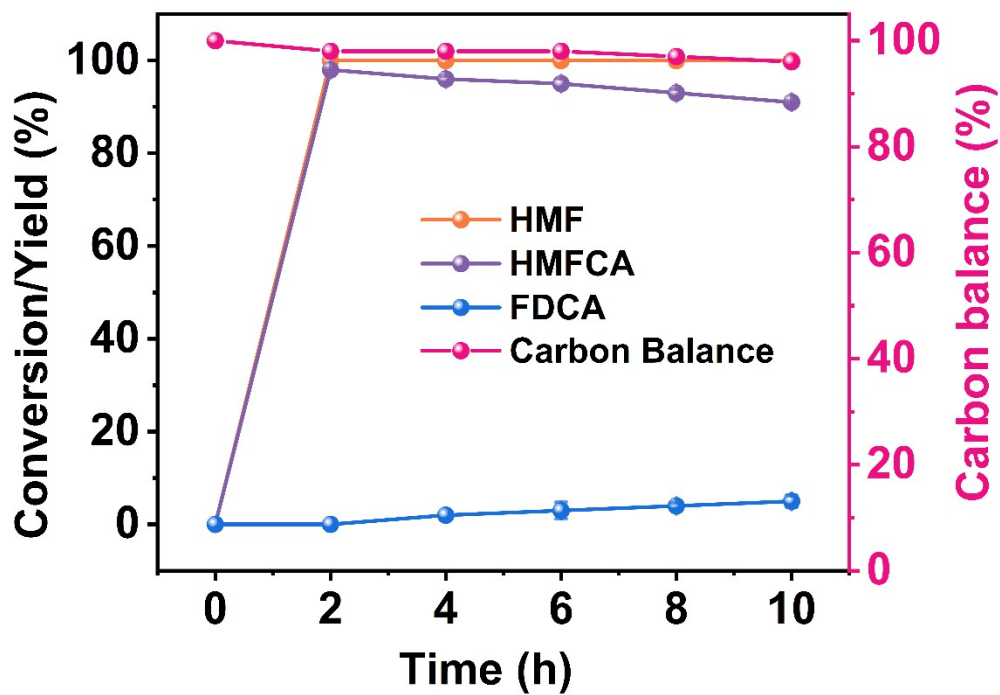

**Fig. S20.** Catalytic oxidation of HMF in the presence of Au/FeO<sub>x</sub>S<sub>y</sub>. (Reaction conditions: 0.1 mmol HMF, 5 mL H<sub>2</sub>O,  $n(\text{Au})/n(\text{Fe}) = 0.1$ ,  $n(\text{NaOH})/n(\text{HMF}) = 5:1$ , 60 °C).



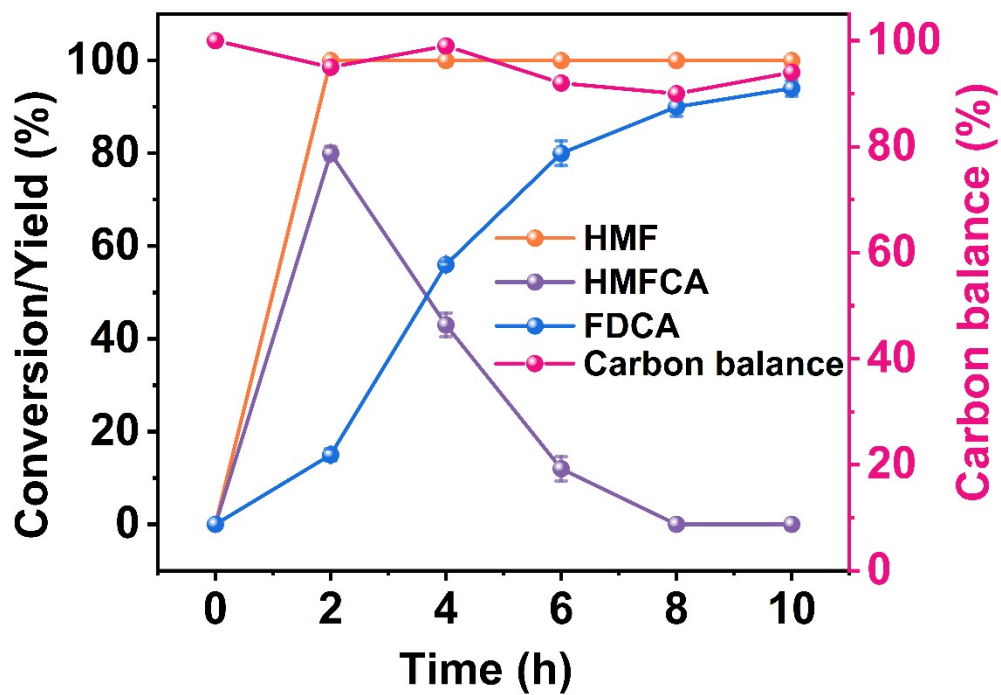

**Fig. S21.** Catalytic oxidation of HMF in the presence of Au/FeO<sub>x</sub>S<sub>y</sub>. (Reaction conditions: 0.1 mmol HMF, 5 mL H<sub>2</sub>O,  $n(\text{Au})/n(\text{Fe}) = 0.3$ ,  $n(\text{NaOH})/n(\text{HMF}) = 5:1$ , 60 °C).

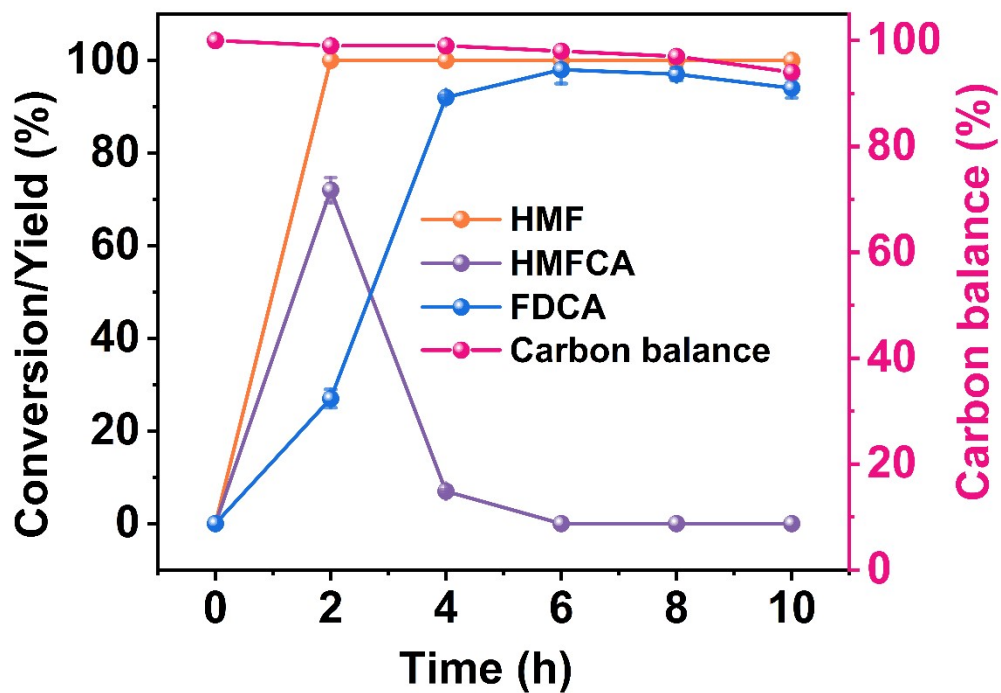

**Fig. S22.** Catalytic oxidation of HMF in the presence of Au/FeO<sub>x</sub>S<sub>y</sub>. (Reaction conditions: 0.1 mmol HMF, 5 mL H<sub>2</sub>O,  $n(\text{Au})/n(\text{Fe}) = 0.7$ ,  $n(\text{NaOH})/n(\text{HMF}) = 5:1$ , 60 °C).

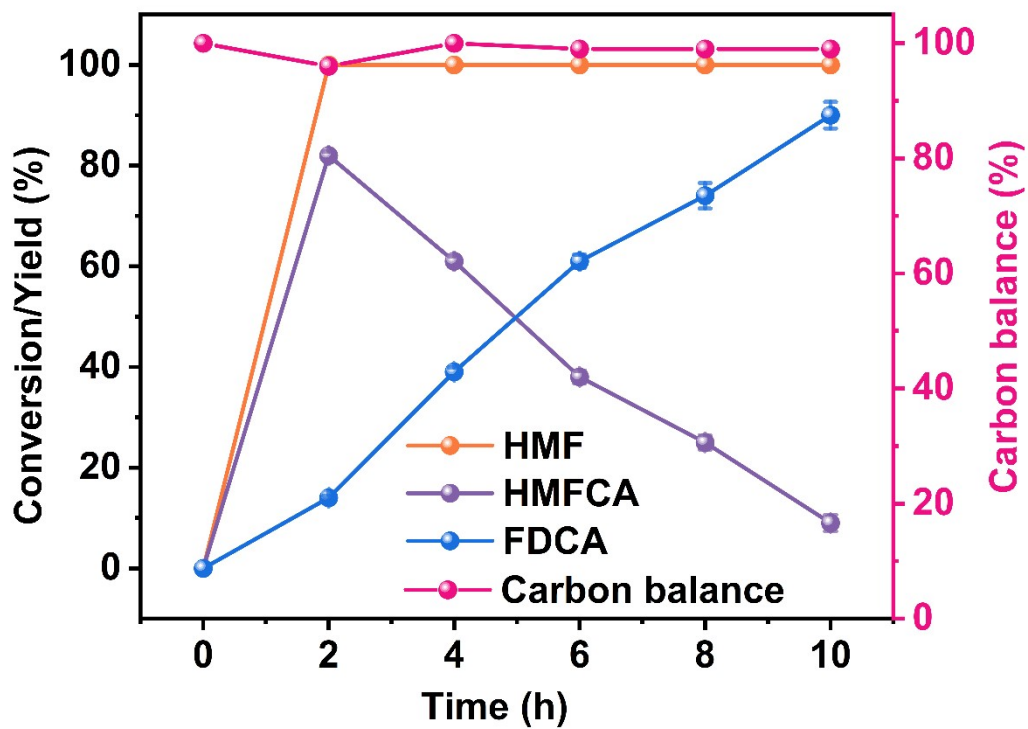

**Fig. S23.** Catalytic oxidation of HMF in the presence of Au/FeO<sub>x</sub>S<sub>y</sub>. (Reaction conditions: 0.2 mmol HMF, 5 mL H<sub>2</sub>O,  $n(\text{Au})/n(\text{Fe}) = 0.5$ ,  $n(\text{NaOH})/n(\text{HMF}) = 5:1$ , 60 °C).

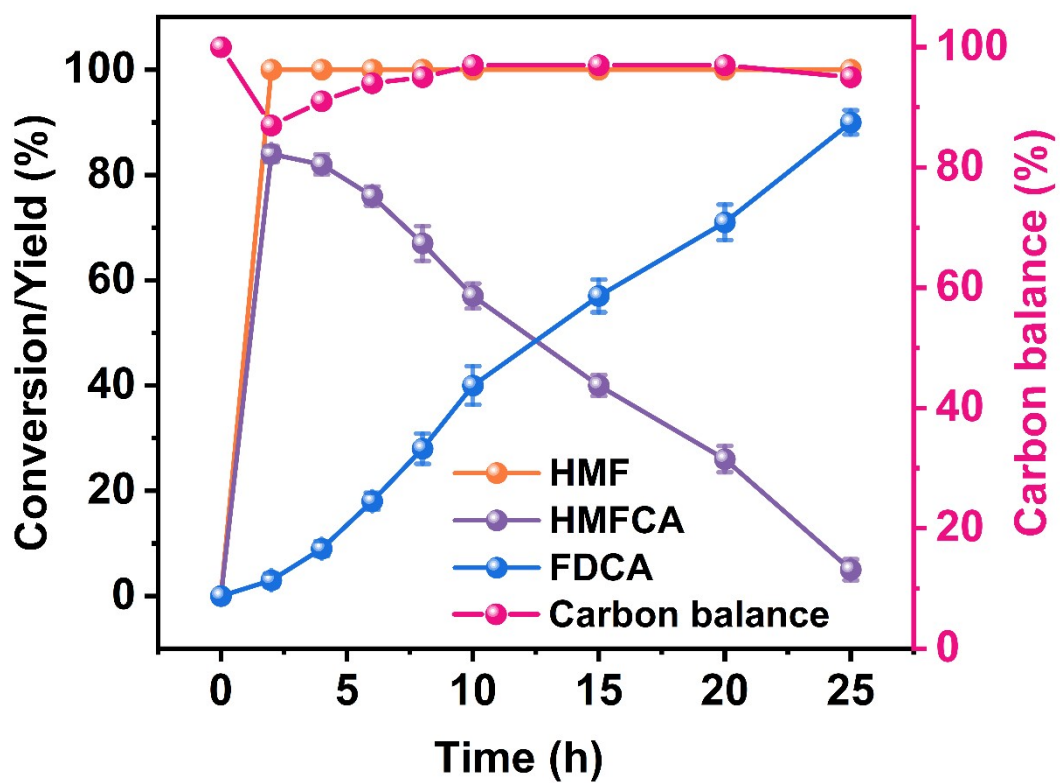

**Fig. S24.** Catalytic oxidation of HMF in the presence of Au/FeO<sub>x</sub>S<sub>y</sub>. (Reaction conditions: 0.4 mmol HMF, 5 mL H<sub>2</sub>O,  $n(\text{Au})/n(\text{Fe}) = 0.5$ ,  $n(\text{NaOH})/n(\text{HMF}) = 5:1$ , 60 °C).

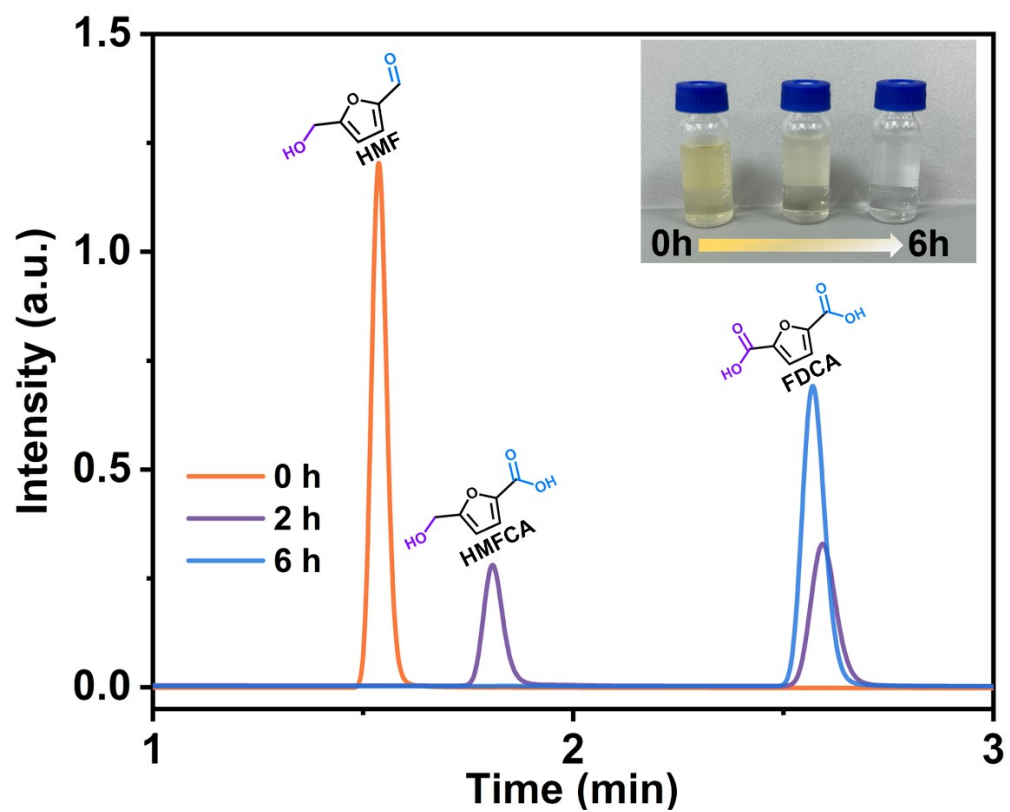

Fig. S25. Liquid chromatograms and changes in the color of the reaction solution.

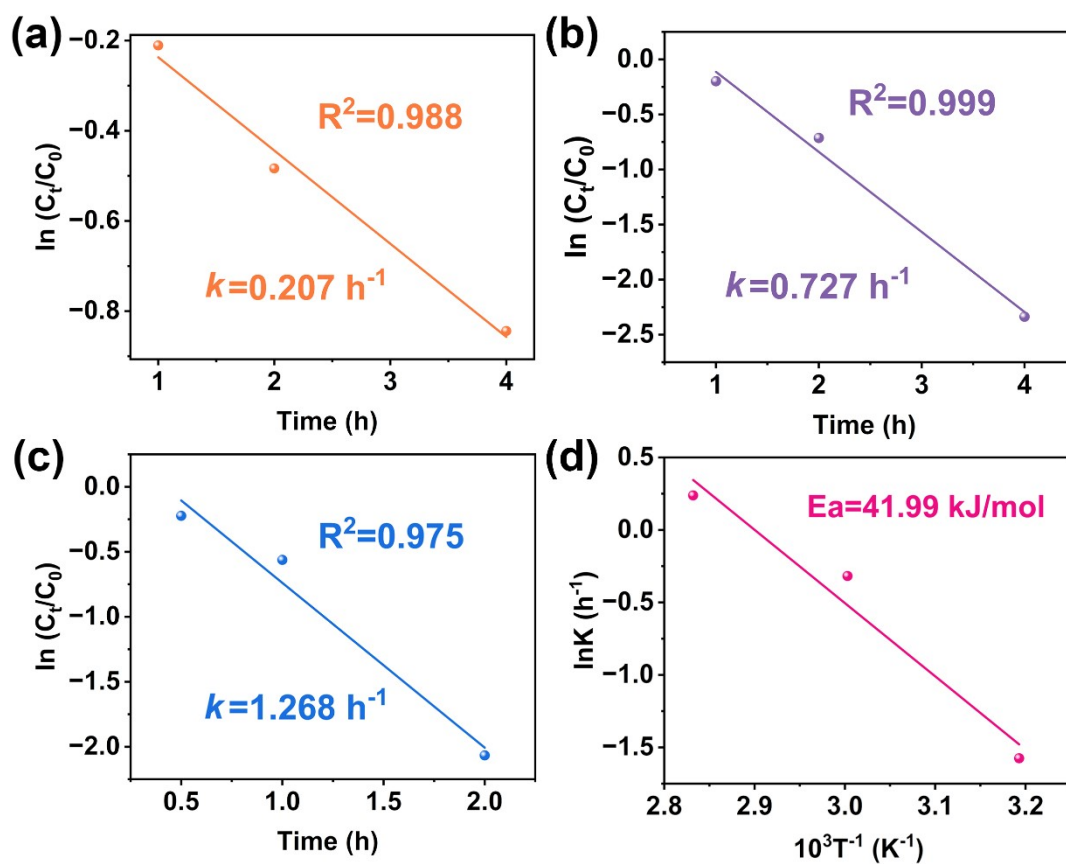

**Fig. 26.** Kinetic fitting curves of HMF oxidation to FDCA at (a) 40°C, (b) 60°C and (c) 80°C. (d) Arrhenius diagram for HMF oxidation to FDCA.

**Table. S1.** Compare the Ea values with other references.

| <b>Catalyst</b>                                               | <b>Ea (kJ/mol)</b> | <b>Reference</b> |
|---------------------------------------------------------------|--------------------|------------------|
| Au/FeO <sub>x</sub> S <sub>y</sub>                            | 41.99 (HMF→FDCA)   | This Work        |
| Au <sub>2</sub> Pd <sub>1</sub> /TiO <sub>2</sub> -0.4CA@HNTs | 78.9 (HMFCa→FDCA)  | [9]              |
| Mn <sub>6</sub> Ce <sub>1</sub> O <sub>x</sub>                | 85.6 (HMF→FDCA)    | [10]             |
| Au <sub>2</sub> Pd <sub>1</sub> /CoO <sub>x</sub> -HPC-500°C  | 87.2 (HMFCa→FDCA)  | [11]             |
| Au <sub>3</sub> Pd <sub>1</sub> /HRN <sub>5</sub> C           | 138.5 (HMFCa→FDCA) | [12]             |

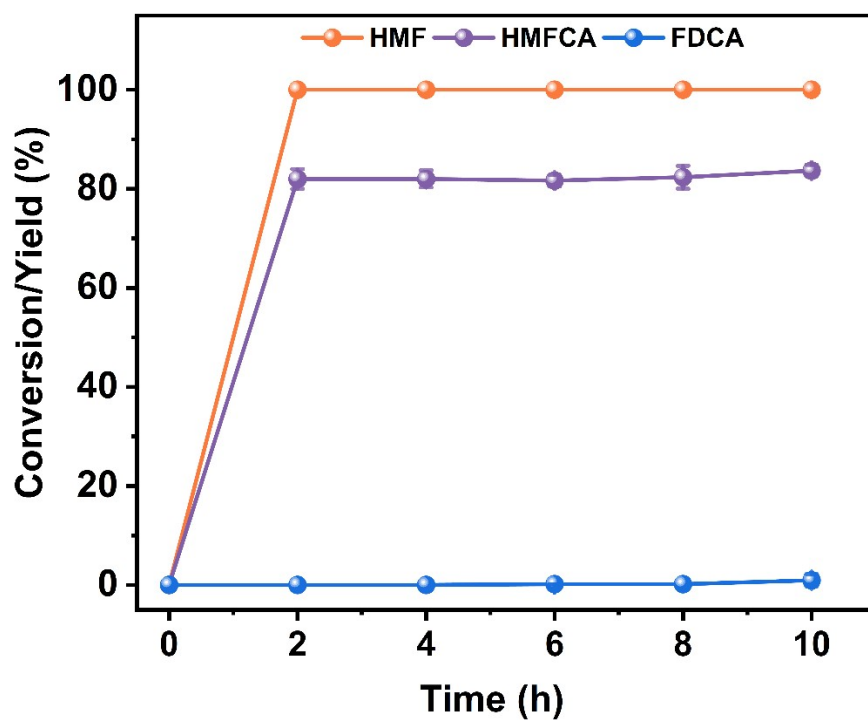

**Fig. S27.** Catalytic oxidation of HMF in the presence of Au/FeO<sub>x</sub>S<sub>y</sub>. (Reaction conditions: 0.1 mmol HMF, 0.1 mmol p-BQ, 5 mL H<sub>2</sub>O,  $n(\text{Au})/n(\text{Fe}) = 0.5$ ,  $n(\text{NaOH})/n(\text{HMF}) = 5:1$ , 60 °C).



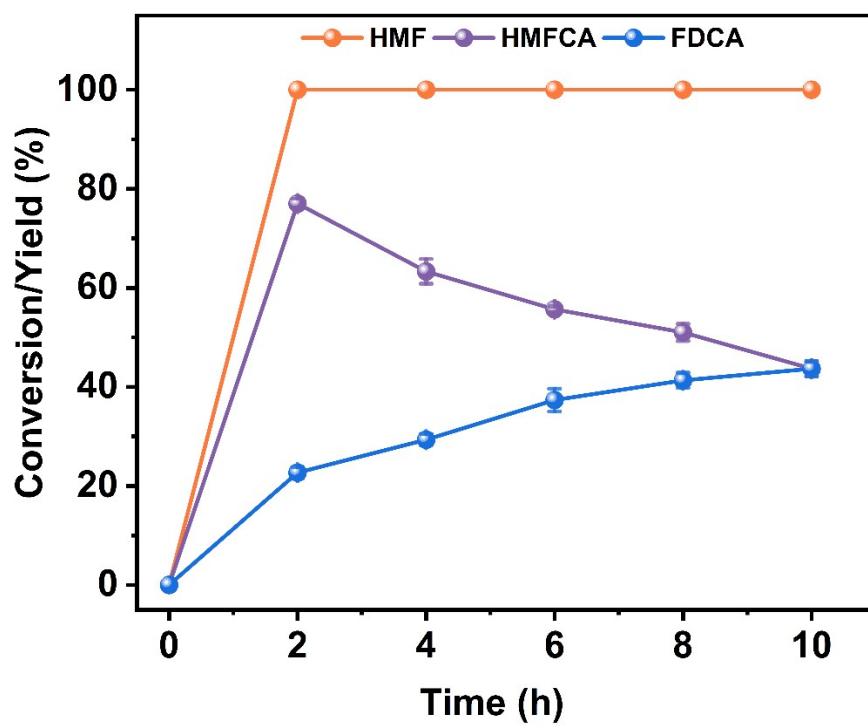

**Fig. S28.** Catalytic oxidation of HMF in the presence of Au/FeO<sub>x</sub>S<sub>y</sub>. (Reaction conditions: 0.1 mmol HMF, 0.1 mmol IPA, 5 mL H<sub>2</sub>O,  $n(\text{Au})/n(\text{Fe}) = 0.5$ ,  $n(\text{NaOH})/n(\text{HMF}) = 5:1$ , 60 °C).

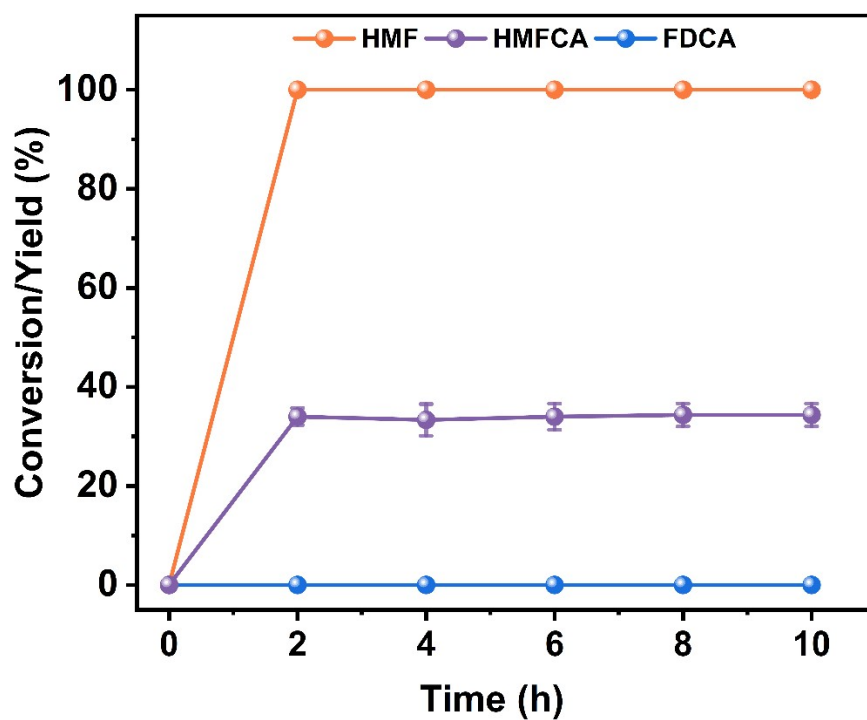

**Fig. S29.** Catalytic oxidation of HMF in the presence of Au/FeO<sub>x</sub>S<sub>y</sub>. (Reaction conditions: 0.1 mmol HMF, 0.1 mmol L-his, 5 mL H<sub>2</sub>O,  $n(\text{Au})/n(\text{Fe}) = 0.5$ ,  $n(\text{NaOH})/n(\text{HMF}) = 5:1$ , 60 °C).

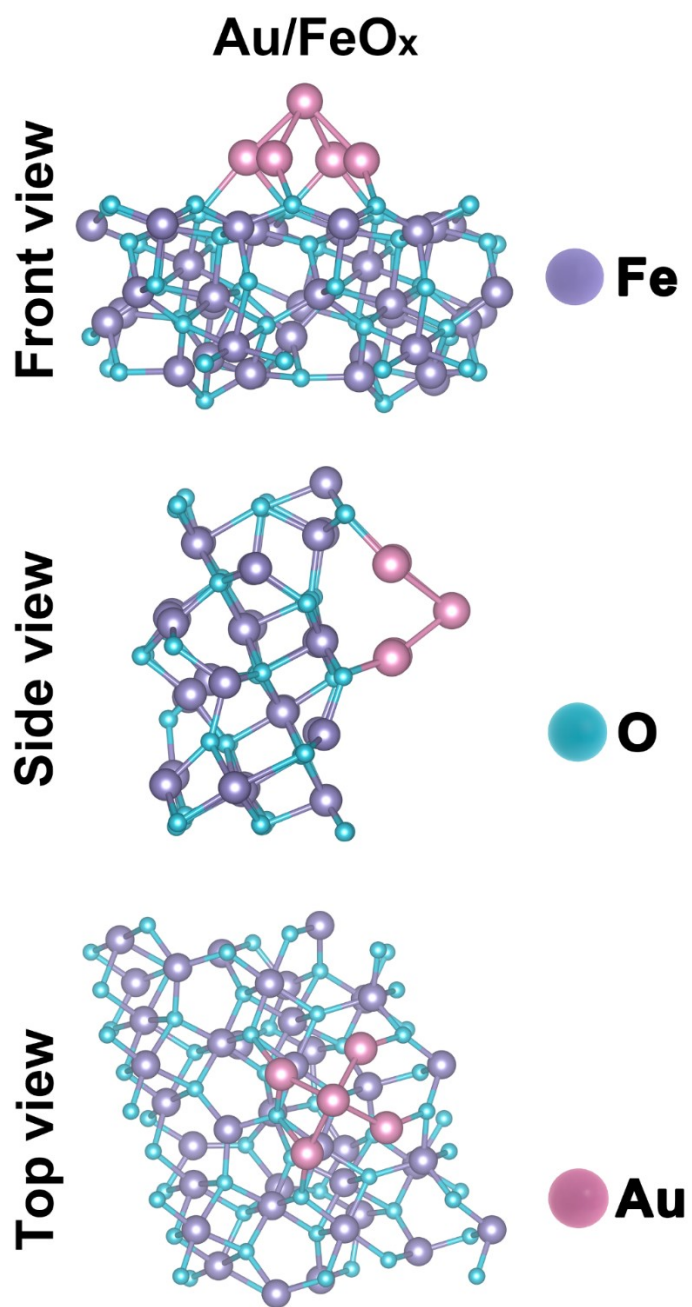

Fig. S30. Au/FeO<sub>x</sub> catalyst after optimization.

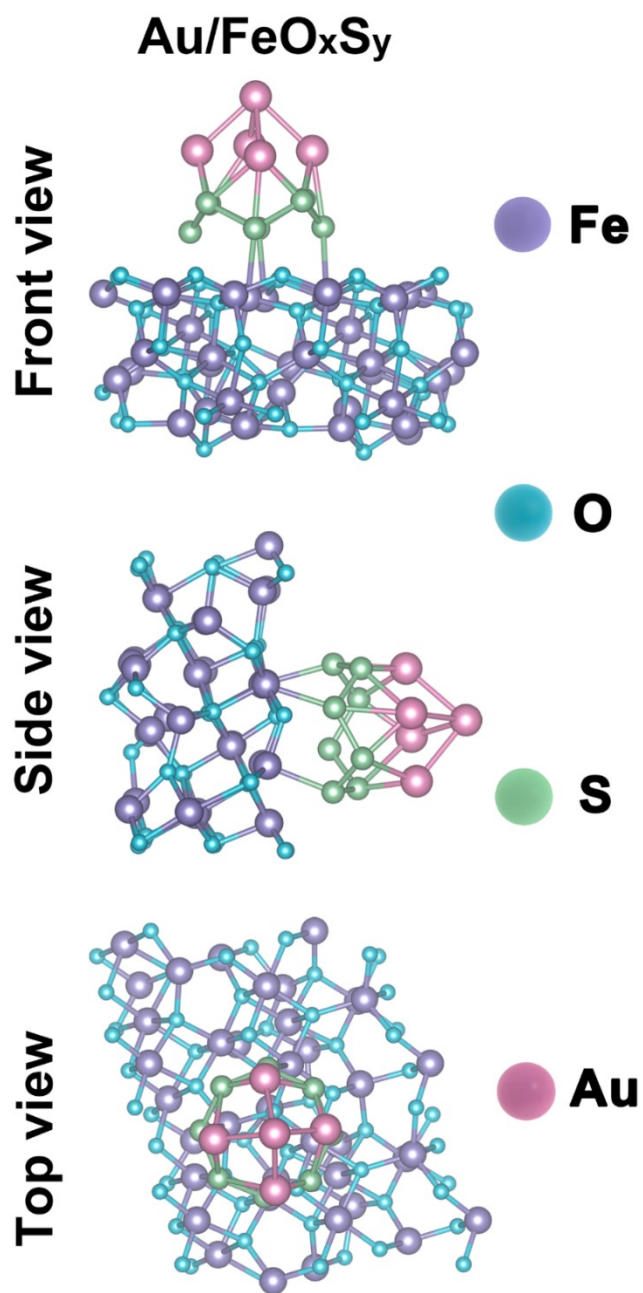

**Fig. S31.** Au/FeO<sub>x</sub>S<sub>y</sub> catalyst after optimization.

## References

- 1 G. Kresse, J. Hafner, *Phys. Rev. B* 1993, **47**, 558-561.
- 2 G. Kresse, J. Hafner, *Phys. Rev. B* 1997, **49**, 14251-14269.
- 3 J. -P. Perdew, K. Burke, M. Ernzerhof, *Phys. Rev. Lett.* 1996, **77**, 3865-3868.
- 4 G. Kresse, D. Joubert, *Phys. Rev. B* 1999, **59**, 1758-1775.
- 5 P. -E. Blöchl, *Phys. Rev. B* 1994, **50**, 17953-17979.
- 6 S. Grimme, J. Antony, S. Ehrlich, H. Krieg, *J. Chem. Phys.* 2010, **132**, 154104.
- 7 J.-K. Nørskov, J. Rossmeisl, A. Logadottir, L. Lindqvist, J.-R. Kitchin, T. Bligaard, H. Jonsson, *J. Phys. Chem. B* 2004, **108**, 46, 17886–17892.
- 8 L.-I. Bendavid, E.-A. Carter, *J. Phys. Chem. C* 2013, **117**, 49, 26048–26059.
- 9 Y. Liu, Y. Chen, Y. Li, W. Guan, Q. Xia, M. Cao, P. Huo, Y. Zhang, *Chem. Eng. J.* 2023, **476**, 146874.
- 10 Q. Liu, Y. Gong, J. Zeng, Y. Zhao, J. Lv, Z. Jiang, C. Hu, Y. Zhou, *ACS Sustainable Chem. Eng.* 2025, **13**, 2107–2119.
- 11 W. Guan, C. Chen, B. Li, Y. Chen, Y. Wei, Y. Cao, F. Wang, Y. Yan, B. Liu, Y. Zhang, *ChemistrySelect* 2022, **7**, e202104058.
- 12 F. Wang, C. Yan, R. Jiang, Y. Chen, Y. Wei, Y. Cao, W. Guan, P. Huo, Y. Zhang, *Appl. Clay Sci.* 2023, **235**, 106872.
